# Supplementary material
Source: ML conference proceedings conference paper supplement (https://proceedings.neurips.cc/paper_files/paper/2019/hash/60a6c4002cc7b29142def8871531281a-Abstract.html)
Supplement: Supplementary file [file 60a6c4002cc7b29142def8871531281a-Supplemental.zip]

---

# Supplementary Material for Deep Leakage from Gradients

---

## 1 Additional Vision Examples

We attach our visualization videos in following anonymized Google Drive <https://drive.google.com/open?id=1u-NVQmXmHnPj57LYyZ0xEbALUCgjhOPL>.

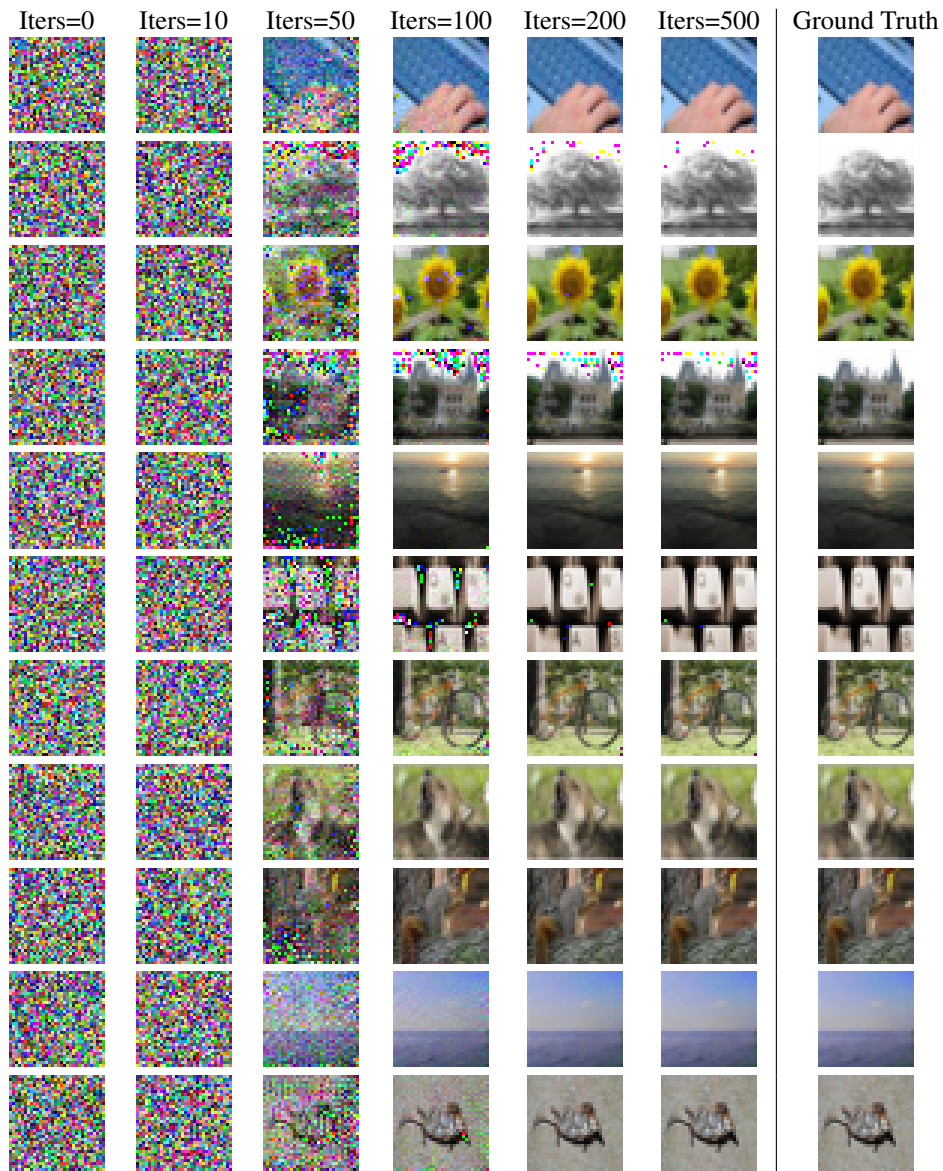

Figure 1: The process of deep leakage on image classification task.

## 2 Additional Language Examples

|                   | Example 1                                                                                                                                                                                                                                                                                                                                                | Example 2                                                                                                                                                                                                                                                                                                                                | Example 3                                                                                                                                                                                                 |
|-------------------|----------------------------------------------------------------------------------------------------------------------------------------------------------------------------------------------------------------------------------------------------------------------------------------------------------------------------------------------------------|------------------------------------------------------------------------------------------------------------------------------------------------------------------------------------------------------------------------------------------------------------------------------------------------------------------------------------------|-----------------------------------------------------------------------------------------------------------------------------------------------------------------------------------------------------------|
| Initial Sentence  | daphne l **rud proceedings dishes<br>**ps studio vatican **cious rafe<br>gasp digitally **oir **oic news<br>depth **ater rebel making cheese<br>**gara = afl thee **sberg died<br>inspirational elm **heart **ifice<br>**ories indicates patch oclc **pres-<br>sive gambia sim **jou dare va writ<br>**minate **hot                                      | spoiled laying **ching **ring tim<br>**amen part phased **cus **rin<br>gs ** **oue **sies **mity chance<br>**sko ia **smith mirror odyssey<br>**sman **l envy icao interest rpm<br>value taipei crambidae **ude rear<br>**bha **cts joyah further [CLS] lo-<br>comotive total itself yves intermedi-<br>ate inquiry                      | **dhi deux **cise state kenny<br>walker **nent **iard **typical till<br>**yne **quent **chua pair nad **N<br>glint tara **kley en **chment roller<br>traditionally **orf **vres **cellu-<br>lar impulse   |
| Iters = 10        | daphne l friends proceedings dishes<br>**ps studios vatican **cious rafe<br>gasp digitally **oir **oic news<br>rotting news depth **ater rebel<br>making cheese **gara = afl thee<br>**sberg died inspirational elm<br>**heart **ifice trinity indicates<br>gambia sim **jou dare tore kept<br>**minate dying                                            | spoiled laying **ching **ring tim<br>**amen part phased **cus **rin gs<br>** **oue **sies **mity chance en-<br>gineer ia **smith mirror odyssey<br>**sman **l hosted icao interest<br>rpm value taipei crambidae bed-<br>side rear **bha **cts joyah further<br>[CLS] locomotive total itself yves<br>intermediate inquiry               | **dhi deux **cise state kenny<br>walker **nent specialising **typi-<br>cal till **yne **quent **chua pair<br>like **N glint tara fare en **chment<br>memory traditionally solid mit<br>**cellular impulse |
| Iters = 20        | daphne l friends proceedings dishes<br>**ps studios vatican intersect<br>**cious rafe gasp digitally **oir<br>rotting news depth **ater rebel<br>making cheese **gara = afl thee<br>**sberg died inspirational elm<br>**heart **ifice trinity indicates<br>patch most **pressive gambia<br>sim **jou dare tore kept **minate<br>dying                    | spoiled laying **ching **ring tim<br>**amen part phased **cus **rin gs<br>** **oue **sies **mity chance en-<br>gineer ia **smith mirror odyssey<br>**sman **l hosted icao interest<br>rpm value taipei crambidae bed-<br>side rear **bha **cts joyah further<br>[CLS] locomotive total itself yves<br>intermediate inquiry               | **dhi deux apprentice state kenny<br>walker trunk specialising **gs be-<br>low **yne **quent fans pair like<br>**N glint a wisdom en ku memory<br>traditionally solid mit **cellular im-<br>pulse         |
| Iters = 30        | daphne l friends proceedings dishes<br>**ps studios vatican specimen<br>**cious rafe gasp digitally keeping<br>rotting news depth coordination<br>rebel making cheese **gara =<br>carolina afl thee crop died inspira-<br>tional elm **heart **ifice trinity<br>indicates patch ( **pressive gambia<br>hub **jou competitive tore kept<br>**minate dying | spoiled laying nash **ring tim<br>**ane part phased commercial<br>**rin sad ** prayers **sies **mity<br>chance line ia burden mirror<br>odyssey **sman **l hosted<br>[MASK] arrival pact value record-<br>ings crambidae ll style **bha shop<br>aria further himself never total<br>itself adverse intermediate inquiry                  | highly ne **uri **ps papers walker<br>trunk recurring its too ) included<br>fans mix like algorithm glint a wis-<br>dom en ku memory traditionally po-<br>sition weapons varying impulse                  |
| Iters = 40        | submissions that violate the ne<br>**uri **ps style or page limits , are<br>not within the scope of ne **uri<br>**ps ( see subject areas above ) , are<br>in submission elsewhere , or have<br>already been published elsewhere<br>may be rejected without further re-<br>view                                                                           | spoiled during finally memorials ( con-<br>firmed ) flaws revealed by the<br>reviewers — including incorrect<br>proof **s independent burden or<br>disagreements 1966 - spaces they<br>arrival , or software recordings<br>crambidae should be amsterdam on<br>as basis has without taking into con-<br>sideration intermediate criteria | typical ne **uri **ps papers often ( but<br>not always ) include a mix of al-<br>gorithm **ic , theoretical , and ex-<br>perimental results , in varying pro-<br>portions                                 |
| Iters = 50        | submissions that violate the ne<br>**uri **ps style or page limits , are<br>not within the scope of ne **uri<br>**ps ( see subject areas above ) , are<br>in submission elsewhere , or have<br>already been published elsewhere<br>may be rejected without further re-<br>view                                                                           | submissions that have fatal ( con-<br>firmed ) flaws revealed by the<br>reviewers — including incorrect<br>proof **s , flawed or insufficient<br>wet - lab , hardware , or software<br>experiments — may be rejected on<br>that basis , without taking into con-<br>sideration other criteria                                            | typical ne **uri **ps papers often ( but<br>not always ) include a mix of al-<br>gorithm **ic , theoretical , and ex-<br>perimental results , in varying pro-<br>portions                                 |
| Original Sentence | Submissions that violate the<br>NeurIPS style or page limits, are<br>not within the scope of NeurIPS<br>(see subject areas above), are in<br>submission elsewhere, or have<br>already been published elsewhere<br>may be rejected without further<br>review.                                                                                             | Submissions that have fatal (con-<br>firmed) flaws revealed by the<br>reviewers—including incorrect<br>proofs, flawed or insufficient<br>wet-lab, hardware, or software<br>experiments—may be rejected<br>on that basis, without taking into<br>consideration other criteria.                                                            | Typical NeurIPS papers often (but<br>not always) include a mix of algo-<br>rithmic, theoretical, and experimen-<br>tal results, in varying proportions.                                                   |

Table 1: The process of deep leakage on masked language model task.
